# Supplementary material
Source: PubMed Central journal article supplement (PMC4269223)

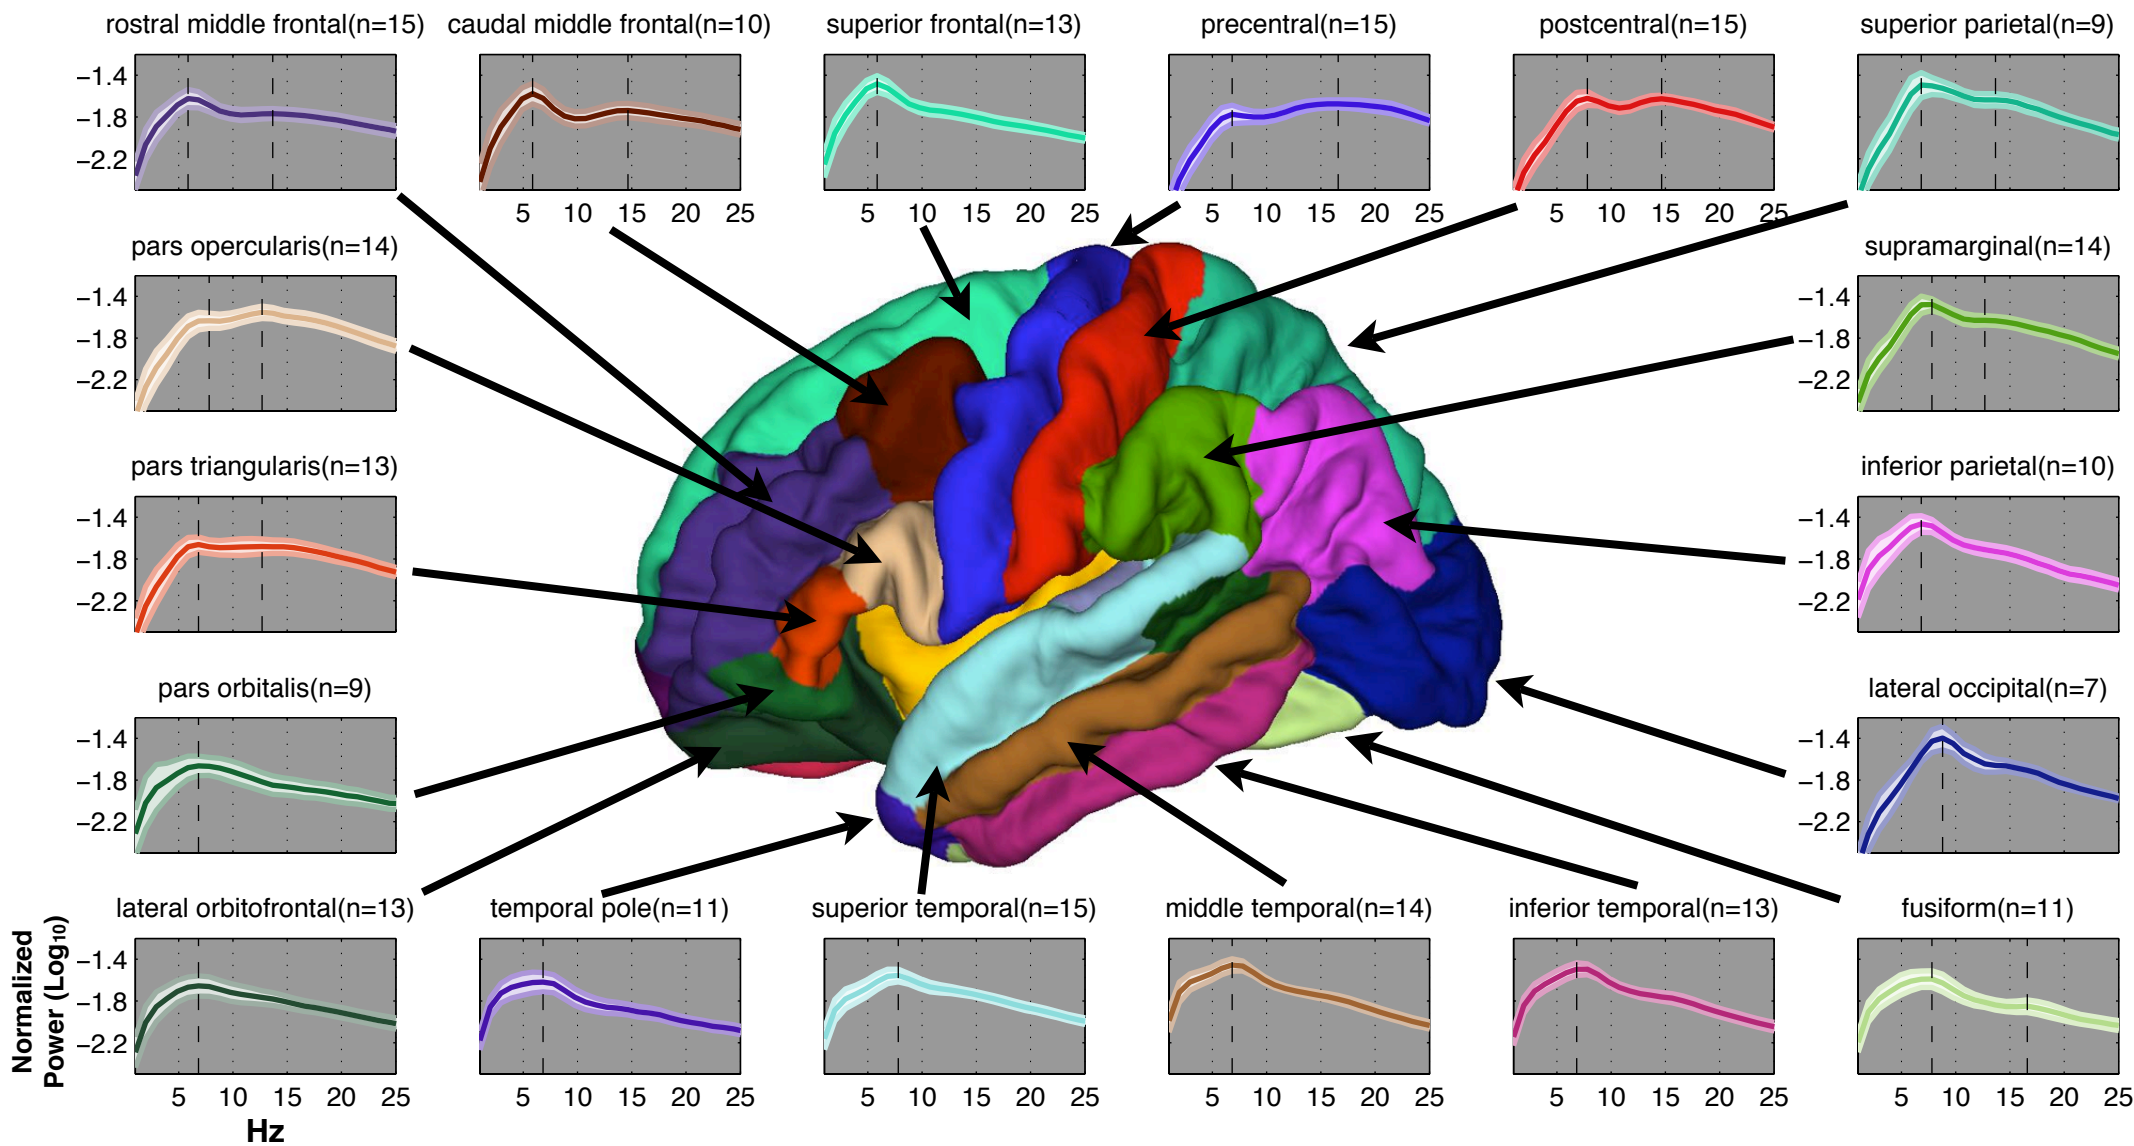

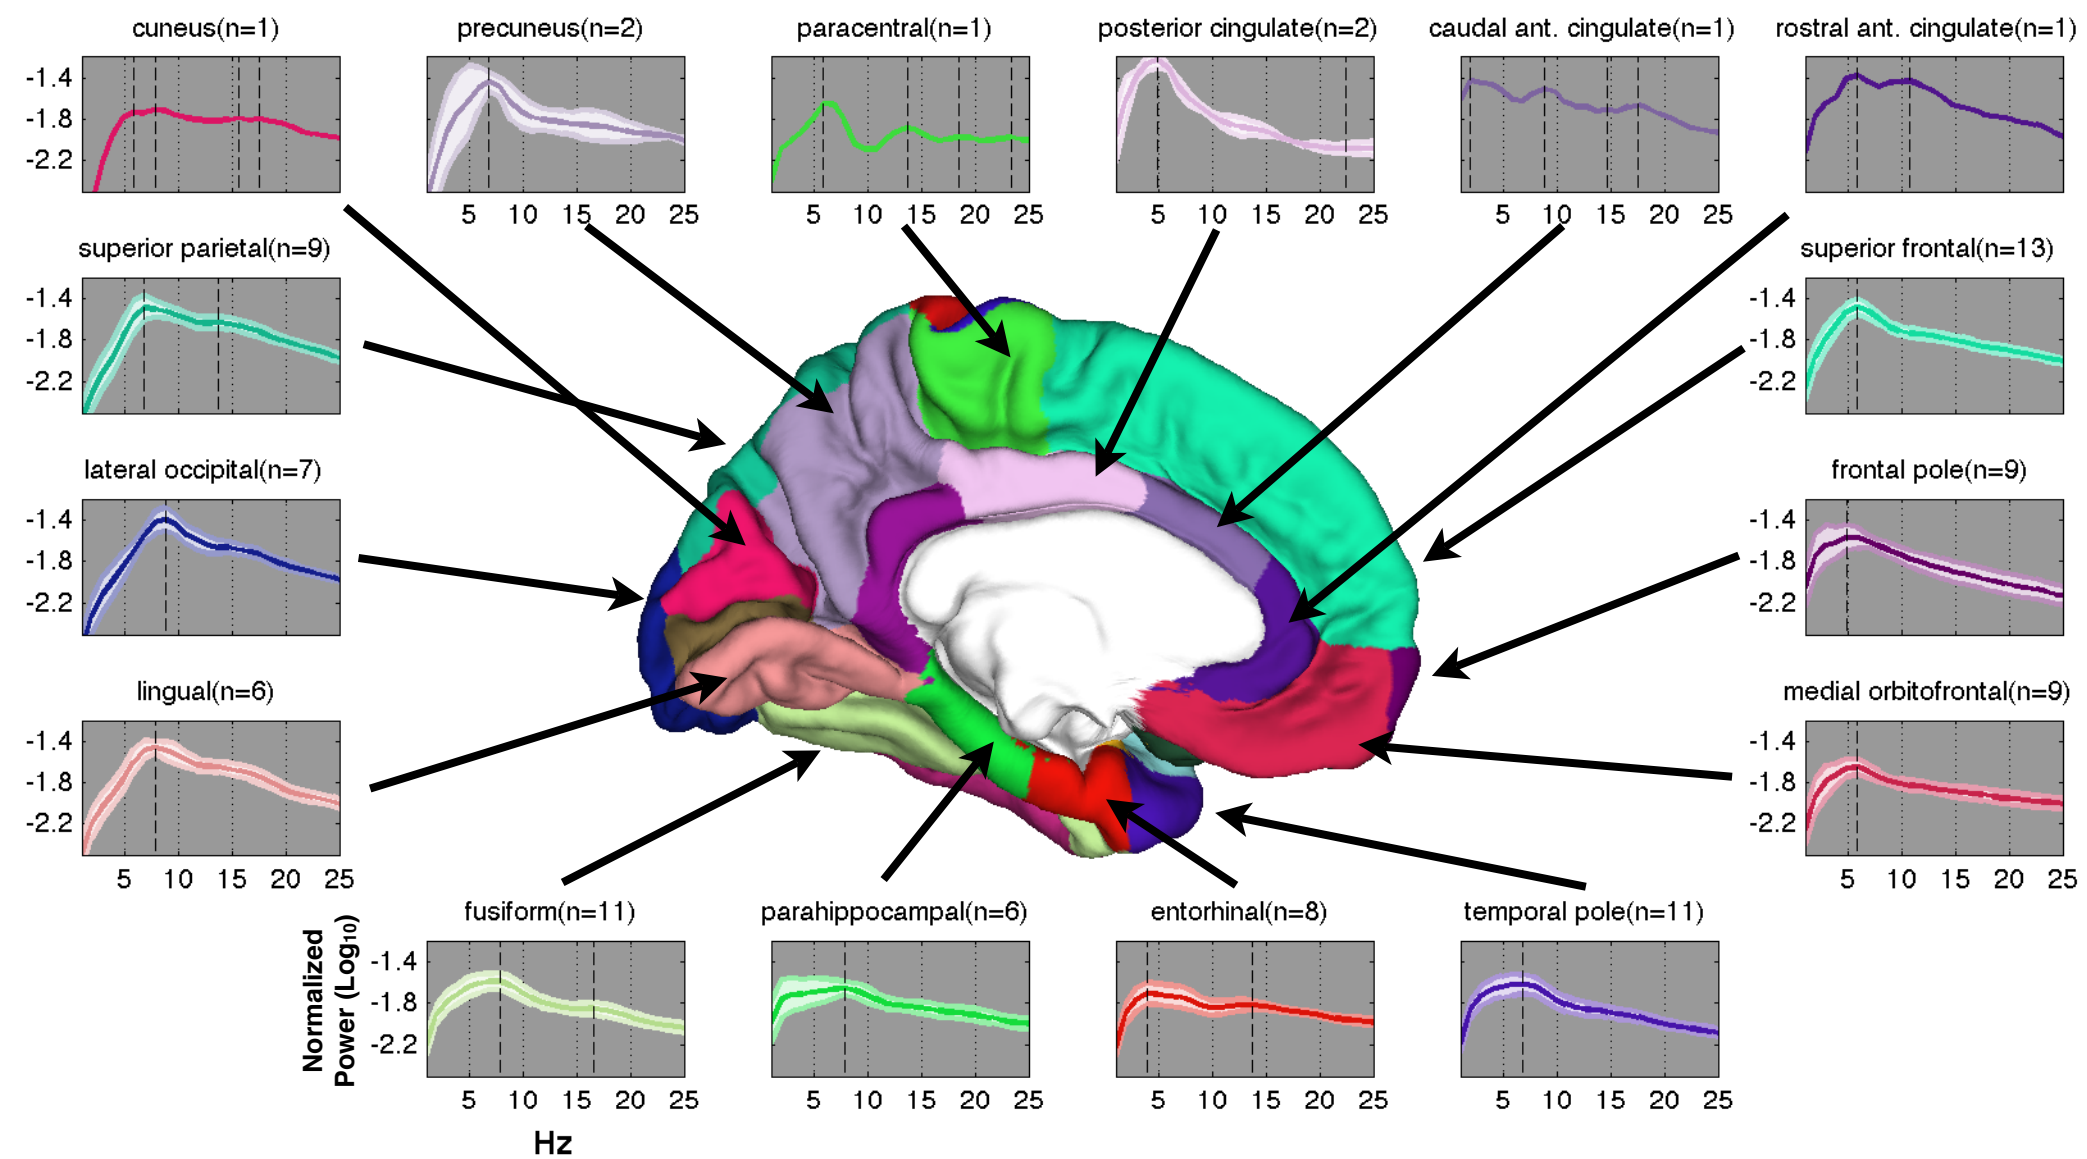

# A: Nonwhitened

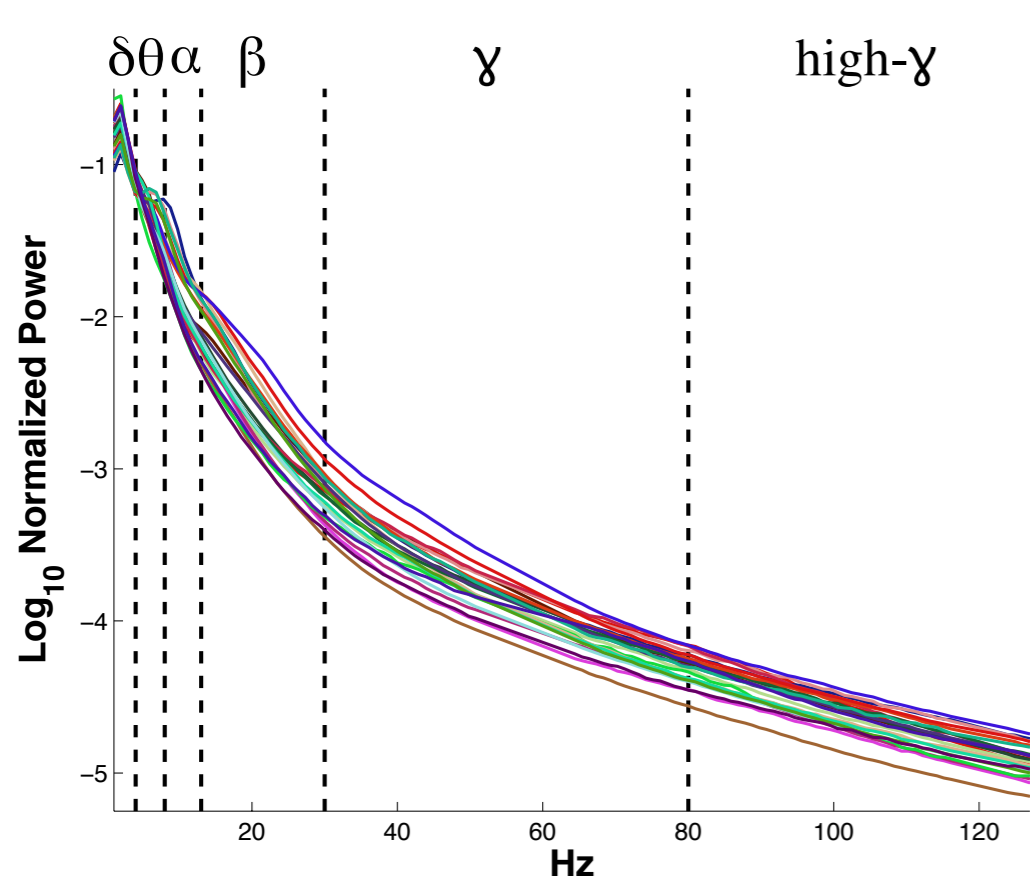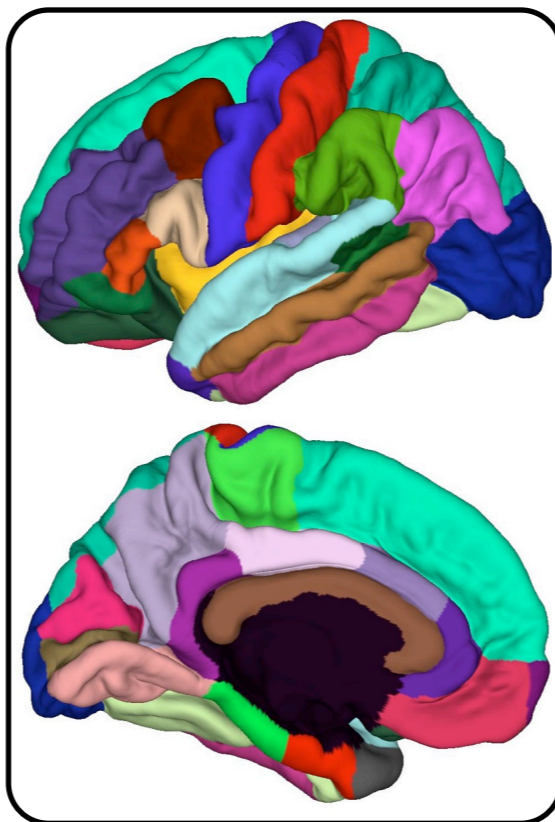

# B: Whitened

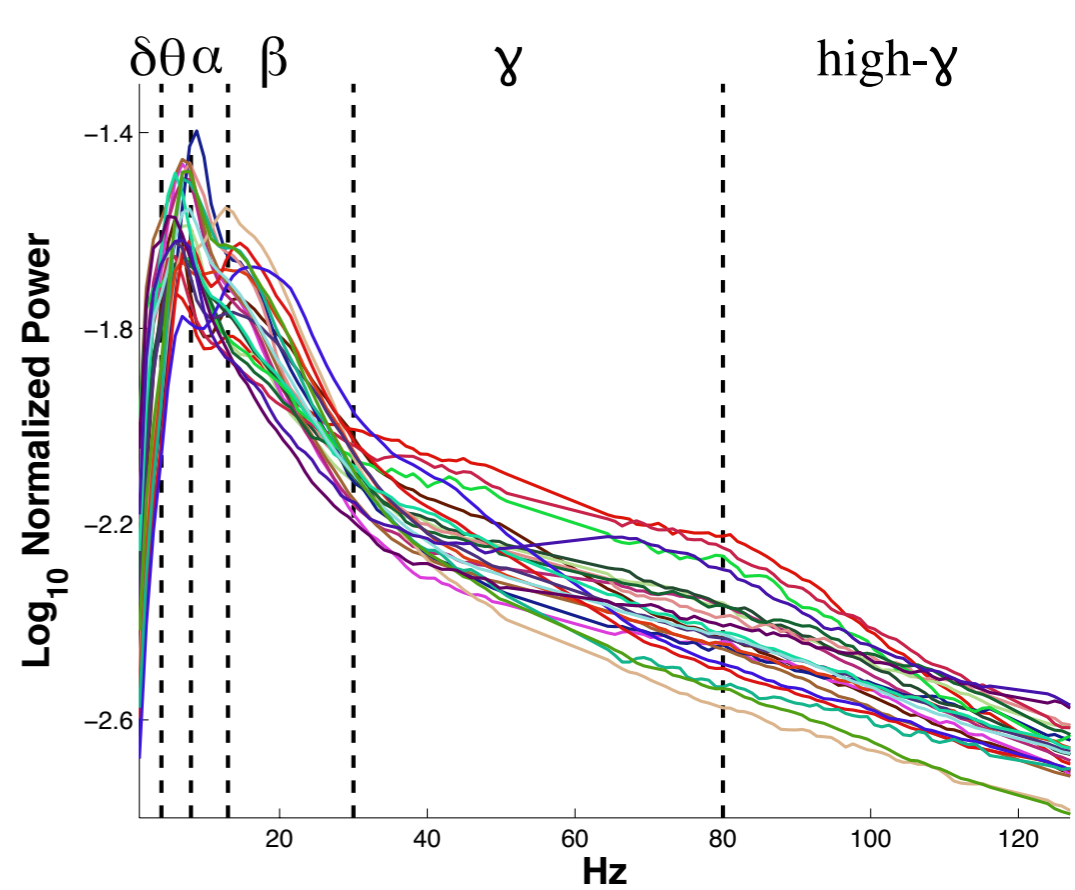

### A: 1-12 Hz Peak Frequency

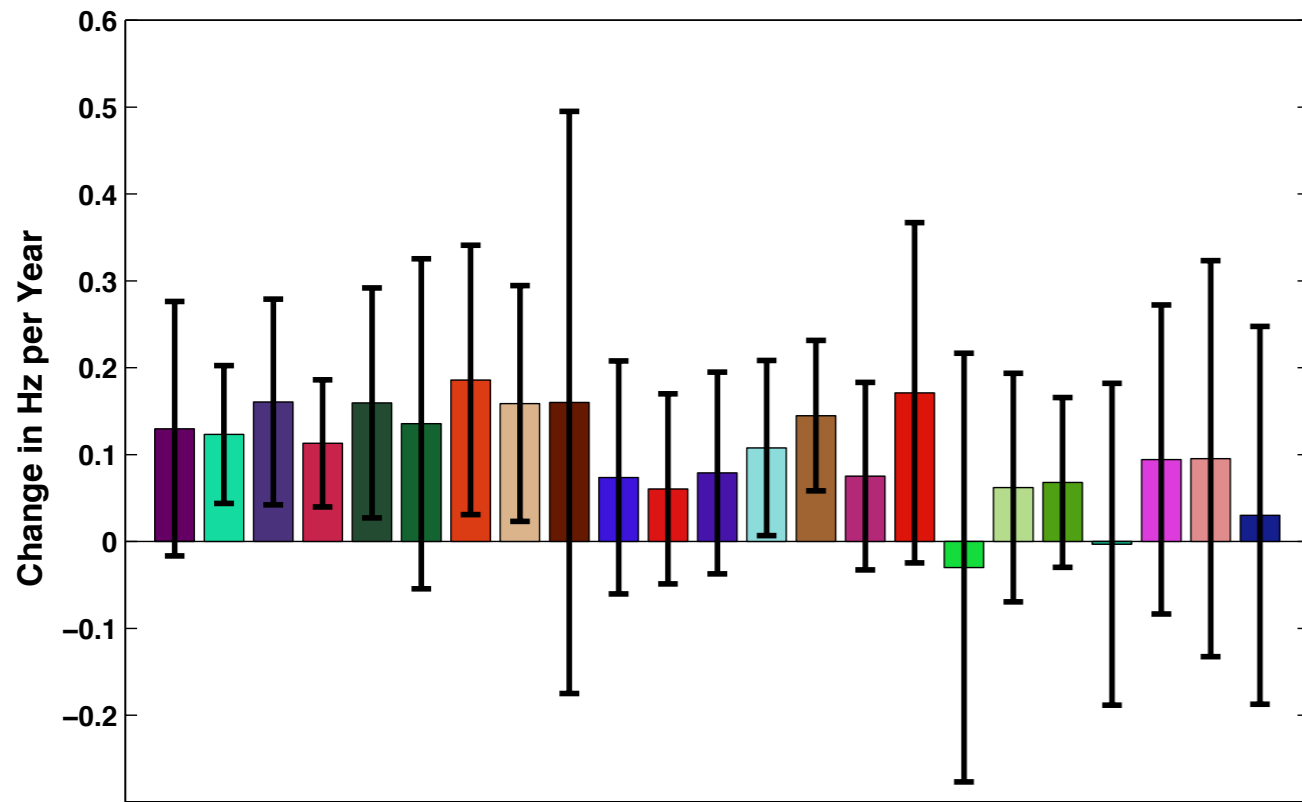

### C: 31-110 Hz Peak Frequency

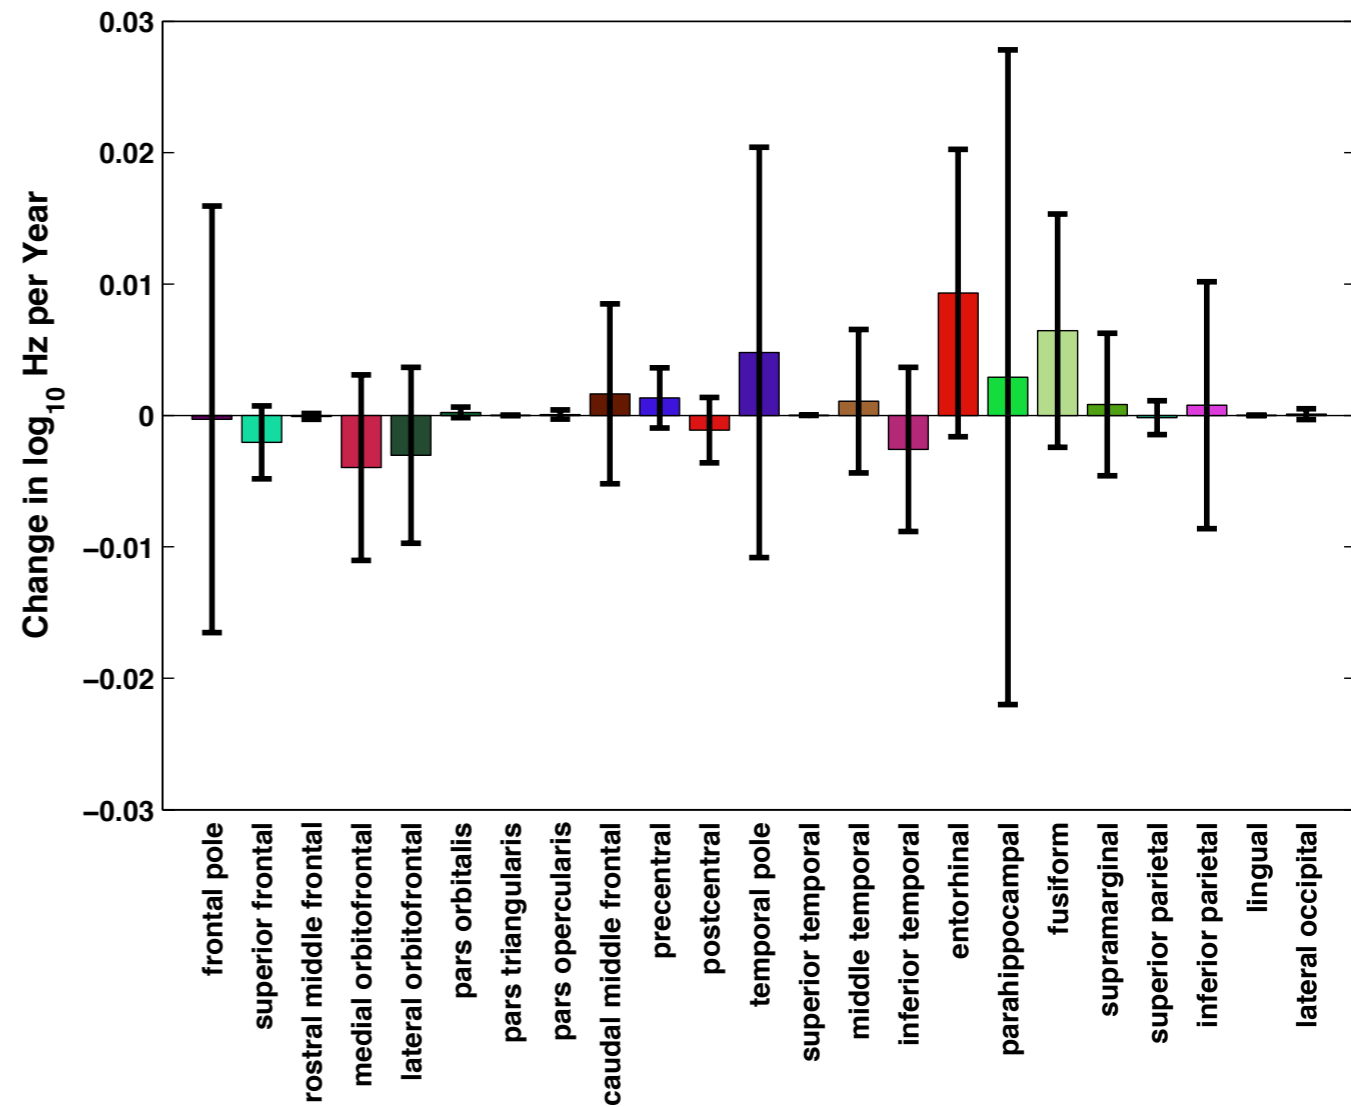

### B: 13-30 Hz Peak Frequency

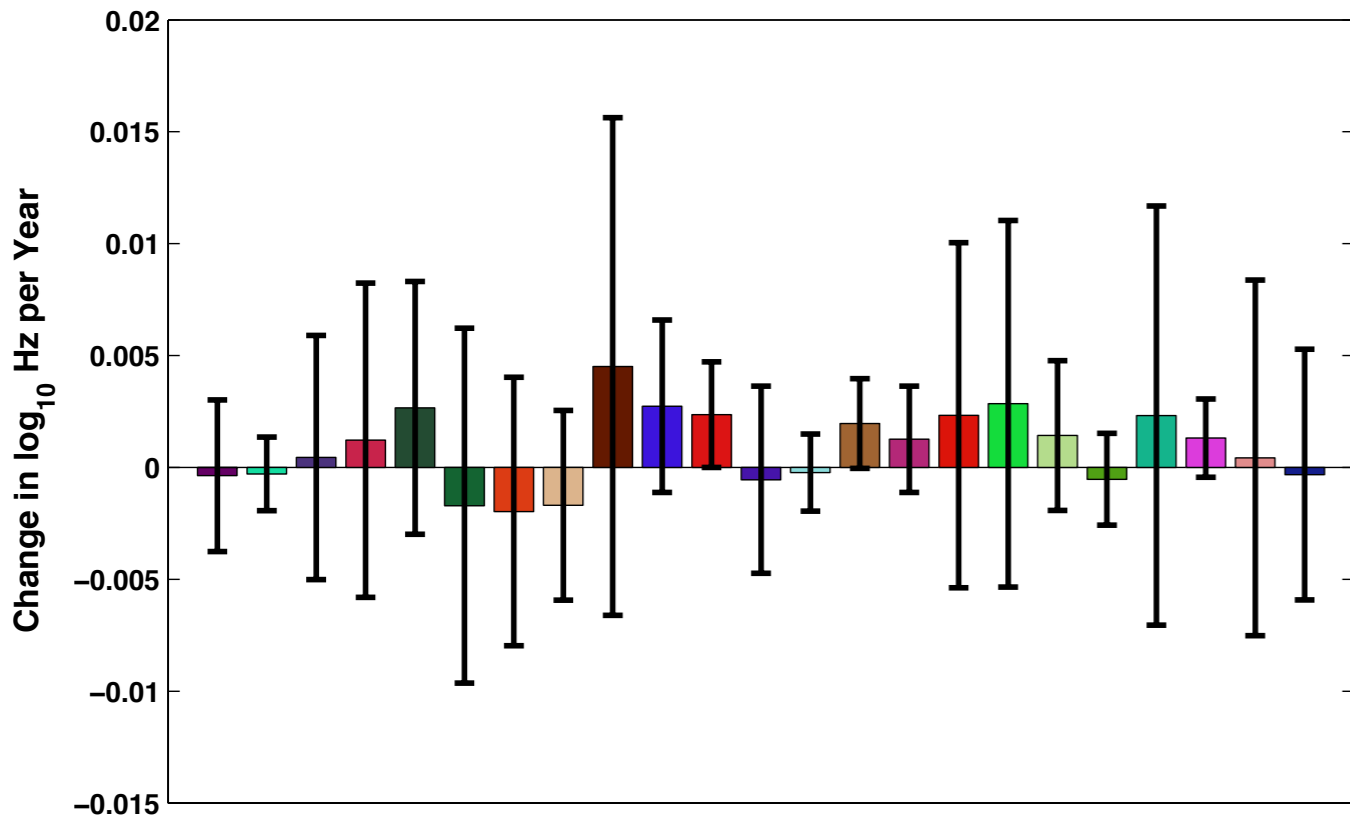

### D: Cortical Areas

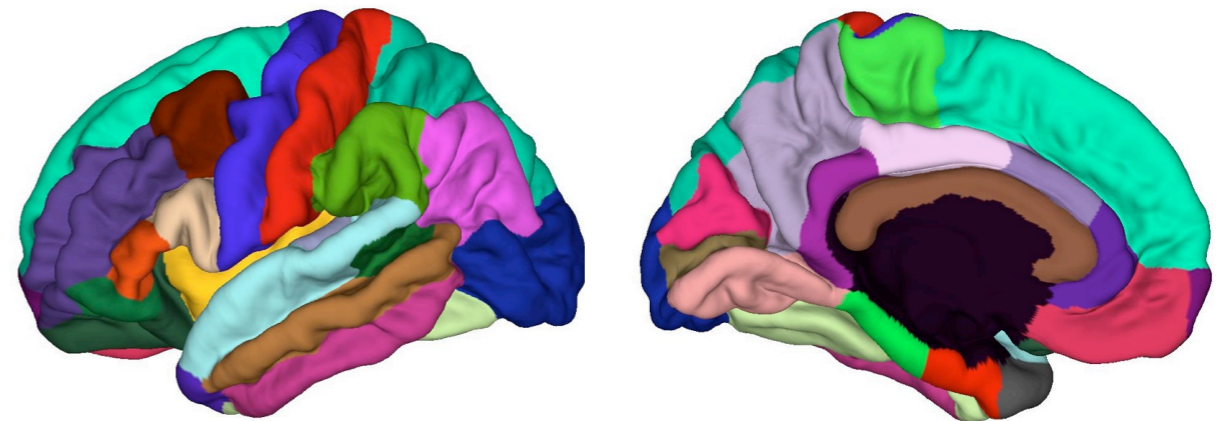

**A: 1-12 Hz Peak Frequency**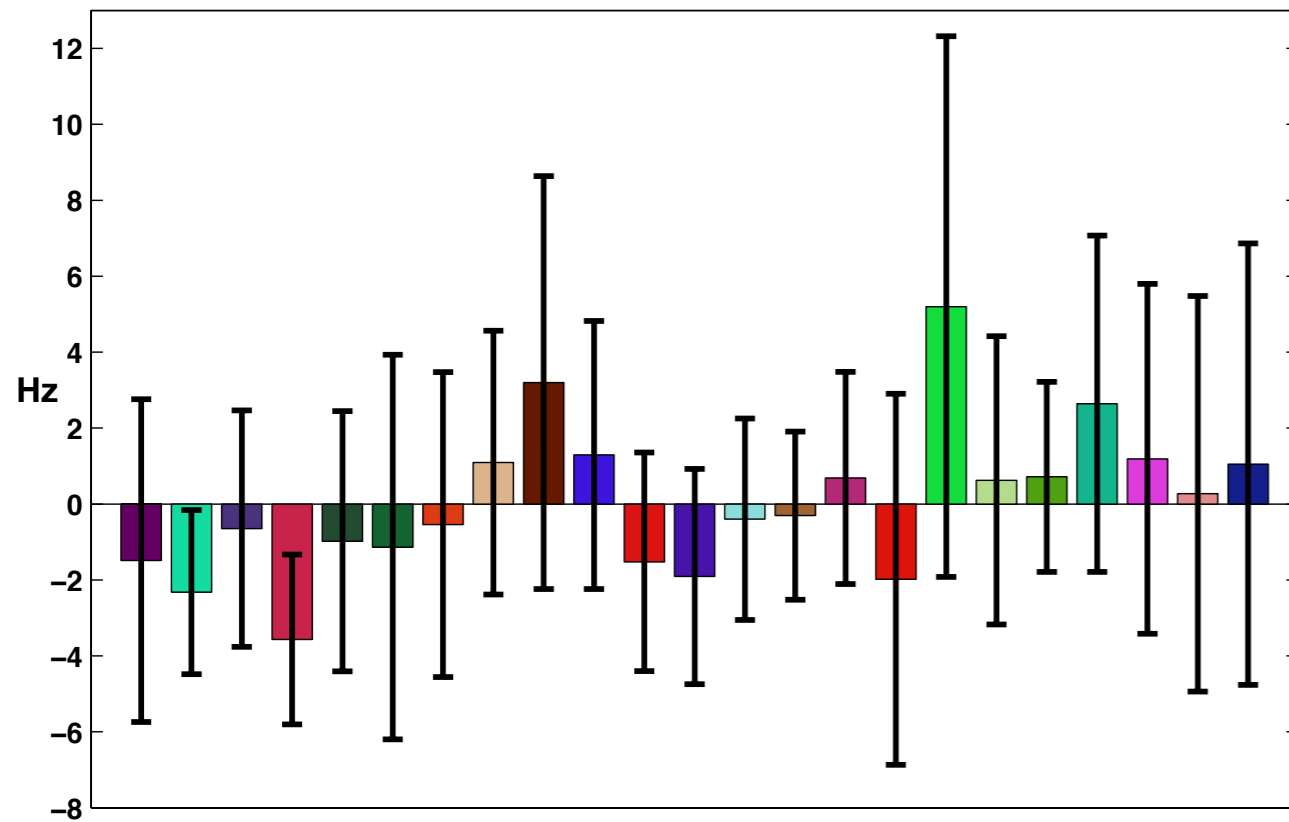**C: 31-110 Hz Peak Frequency**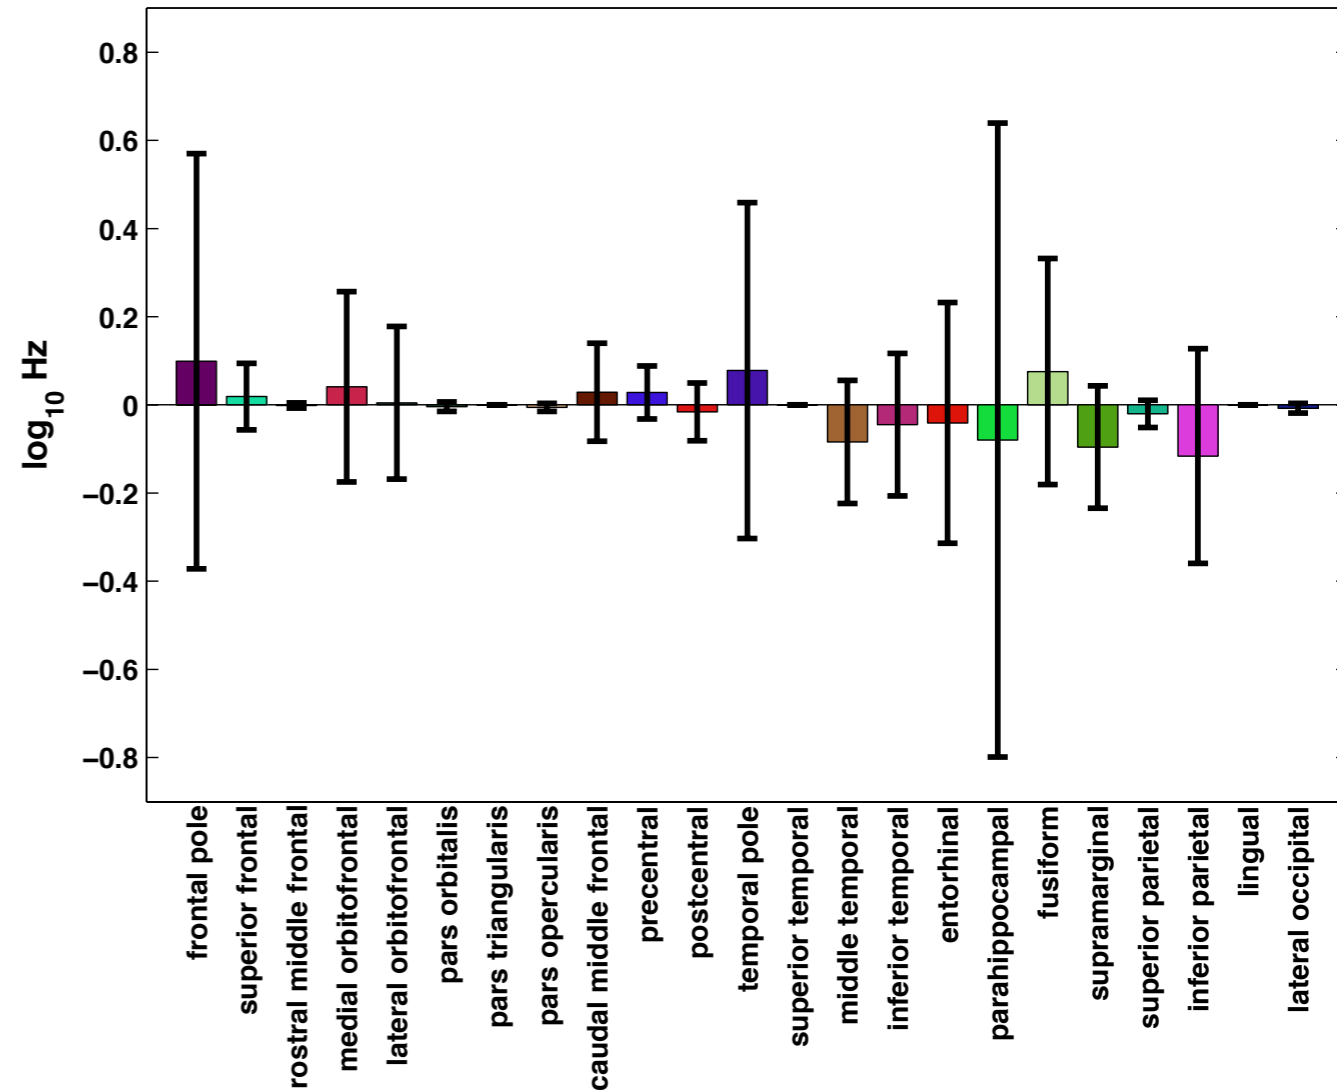**B: 13-30 Hz Peak Frequency**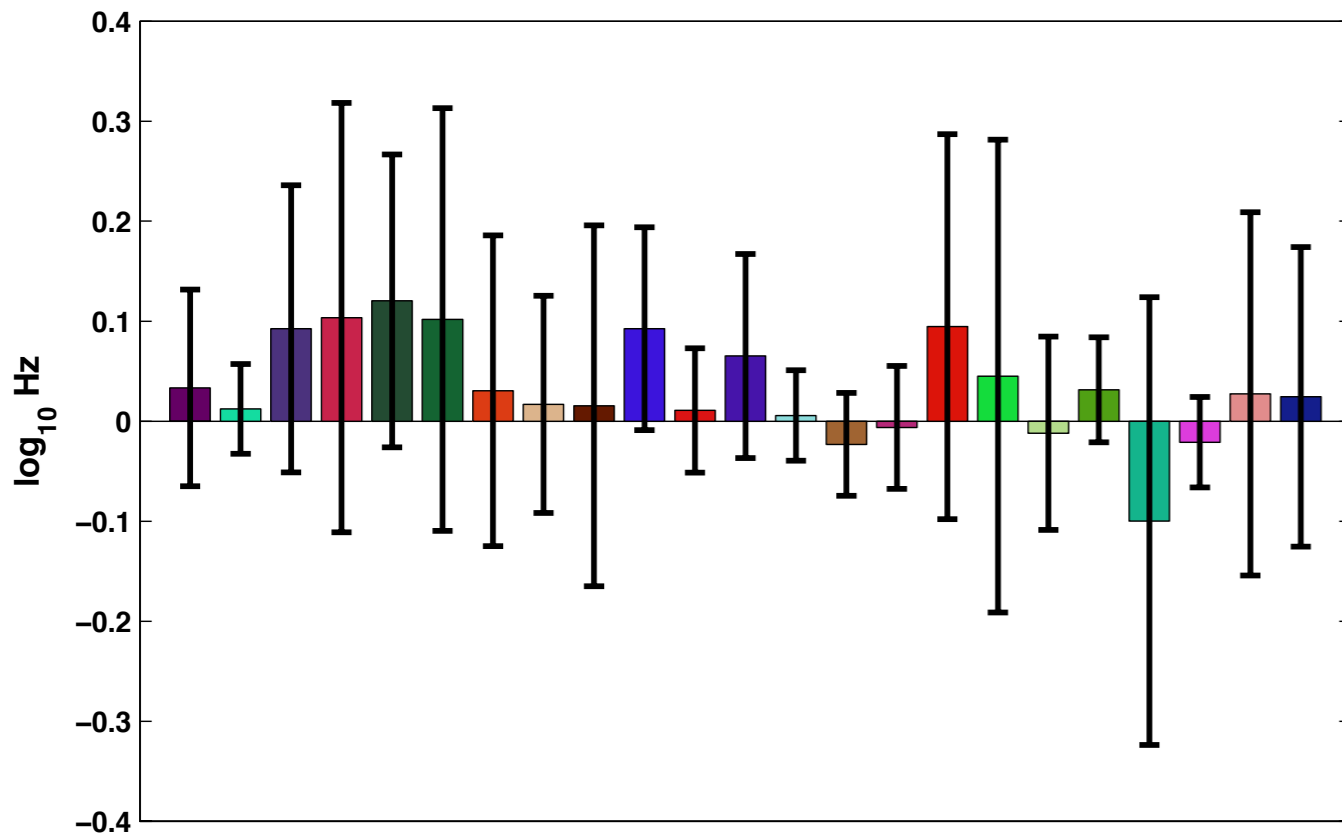**D: Cortical Areas**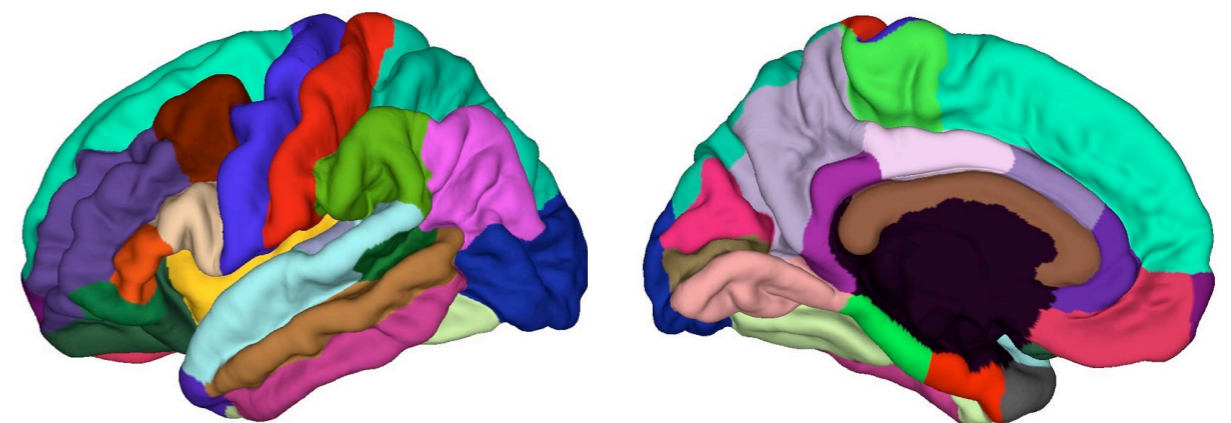

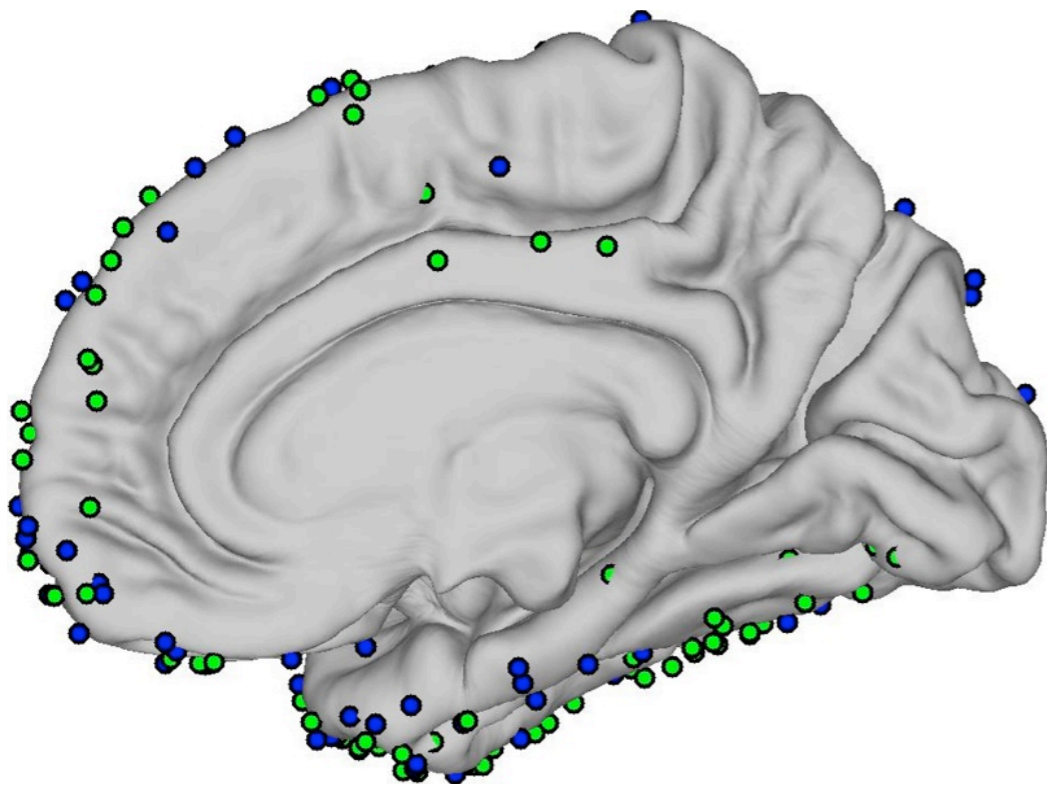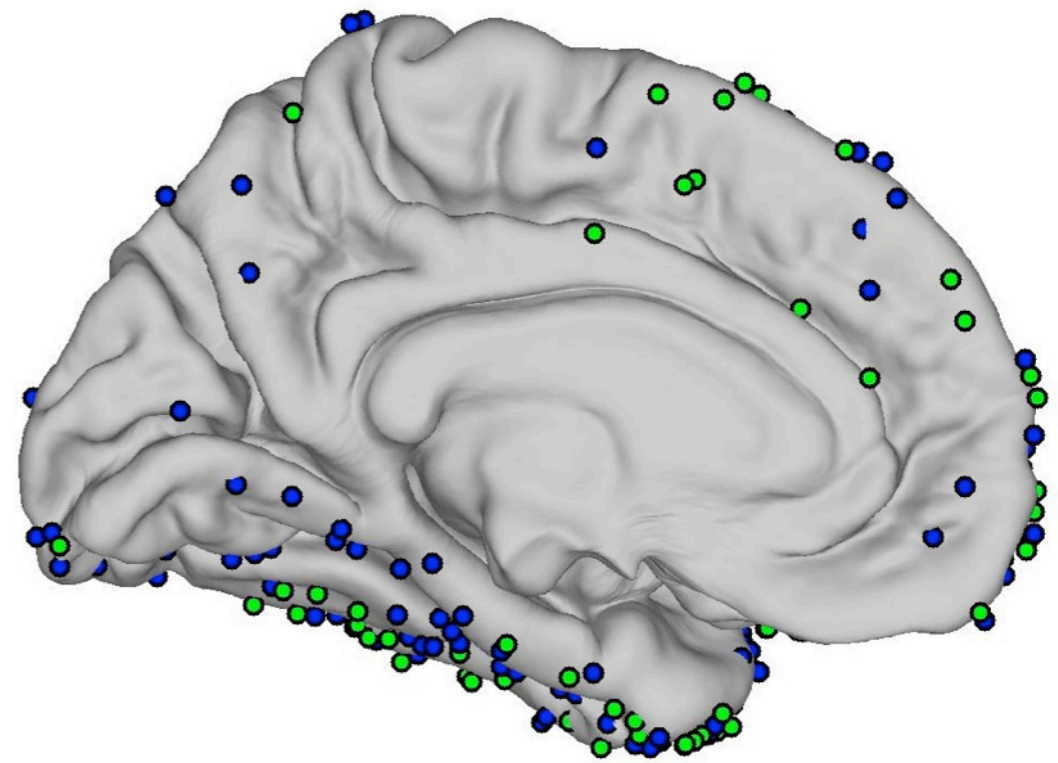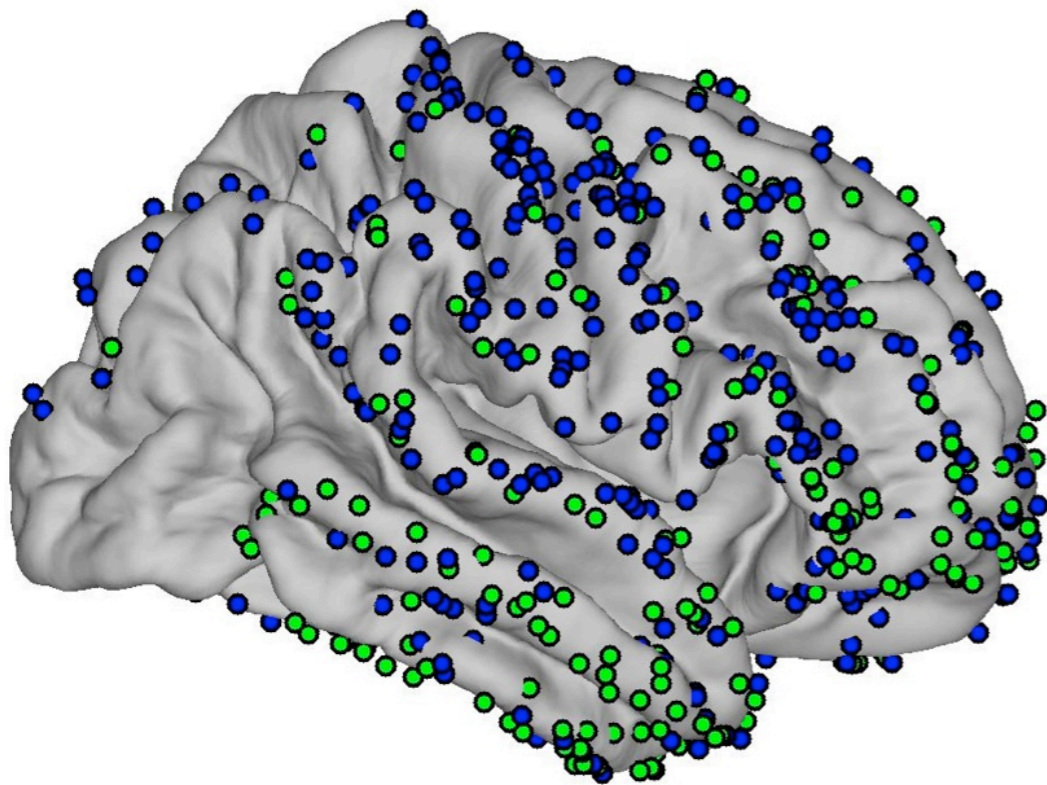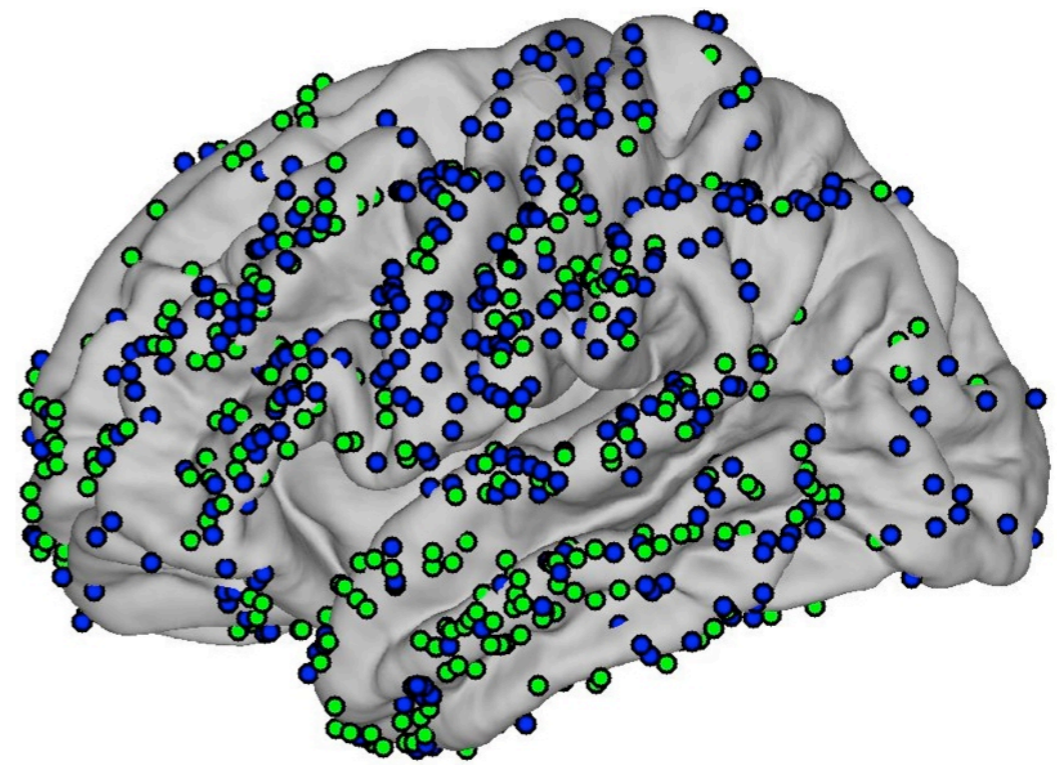

**3 & 6 Hz**      **9 & 15 Hz**

**A: 3 Hz Cluster**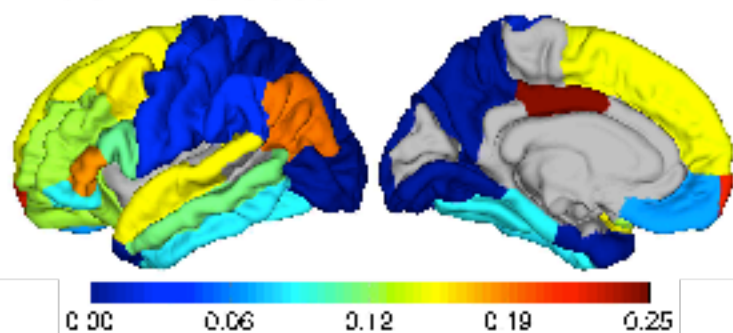**B: 5 Hz Cluster**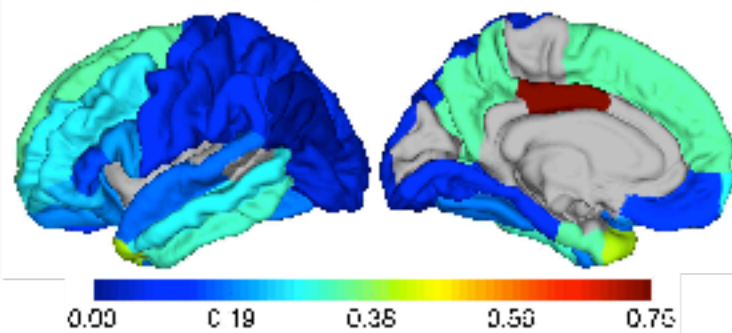**C: 7 Hz Cluster (Narrow)**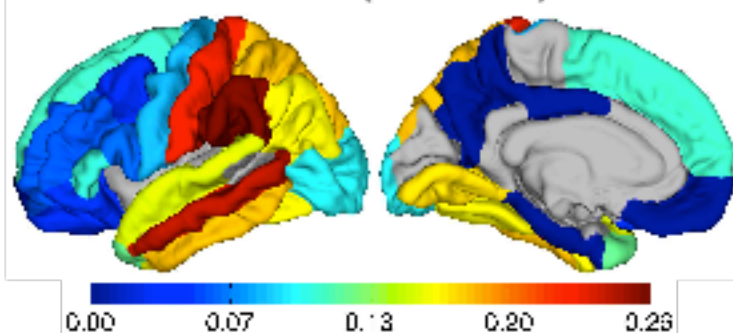**D: 7 Hz Cluster (Broad)**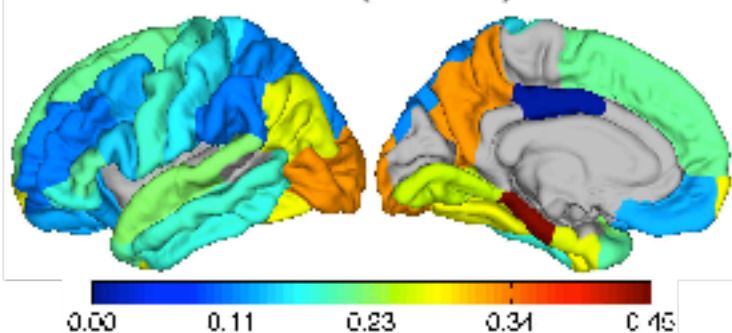**D: 10 Hz Cluster**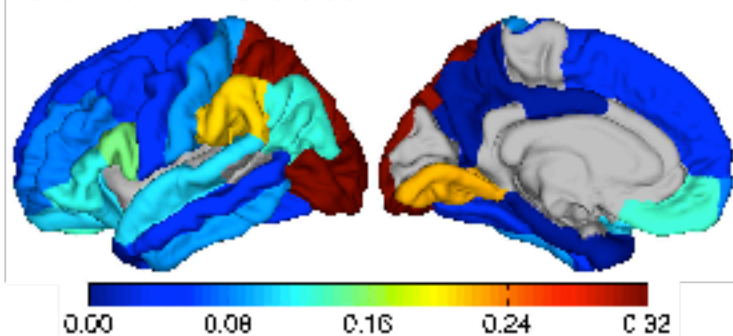**E: 17 Hz Cluster**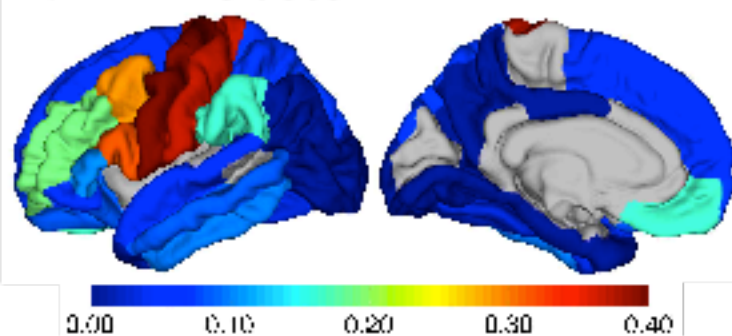**F: 8, 19, 42 Hz Cluster**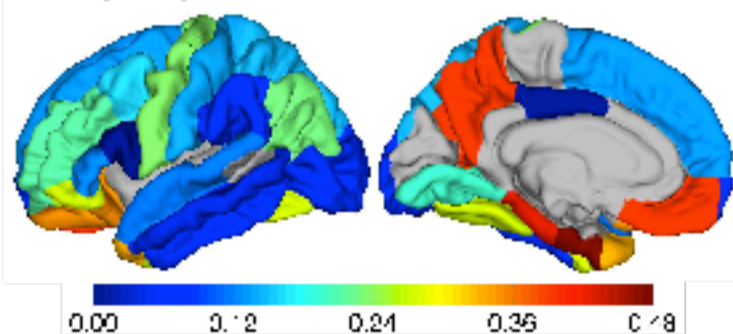

Supplement: NIHMS647364-supplement-Supplementary_Figures.pdf [file NIHMS647364-supplement-Supplementary_Figures.pdf]
